# Supplementary material for: A Novel In Silico Benchmarked Pipeline Capable of Complete Protein Analysis: A Possible Tool for Potential Drug Discovery
Source: MDPI journal article supplement (doi:10.3390/biology10111113), 2021-10-28
Supplement: s1 [file s1]

# A Novel *In Silico* Benchmarked Pipeline Capable of Complete Protein Analysis: A Possible Tool for Potential Drug Discovery

## Authors

D. D. B. D. Perera <sup>1,\*,\,†,\‡</sup>, K.Minoli L. Perera <sup>1</sup> and Dinithi C. Peiris <sup>2,\*,\,†</sup>

## Affiliations

<sup>1</sup> Department of Zoology, Faculty of Applied Sciences, University of Sri Jayewardenepura,

Nugegoda 10250, Sri Lanka; mperera95826@gmail.com

<sup>2</sup> Genetics & Molecular Biology Unit (Center for Biotechnology), Department of Zoology, Faculty of Applied Sciences, University of Sri Jayewardenepura, Nugegoda 10250, Sri Lanka

\* Correspondence: desh.02236@gmail.com (D.D.B.D.P.); dinithi@sci.sjp.ac.lk (D.C.P.); Tel.: +94-714-018-537 (D.C.P.)

† Current address: Department of Biochemistry & Molecular Biology, Cumming School of Medicine, University of Calgary, Calgary, AB T2N 1N4, Canada.

\‡ Equal corresponding authors.

## CONTENTS

|                                                                                                          |    |
|----------------------------------------------------------------------------------------------------------|----|
| 1. Analysis of Cystatin C.....                                                                           | 3  |
| 2. Analysis of Human and Rat AChE.....                                                                   | 11 |
| 3. Docking analysis between Survivin protein and 4-hydroxypyridine 1-oxide pyridin-4-ol<br>1-oxide ..... | 18 |
| 4. Docking analysis between Haemoglobin and Heam. ....                                                   | 20 |

# 1. Analysis of Cystatin C

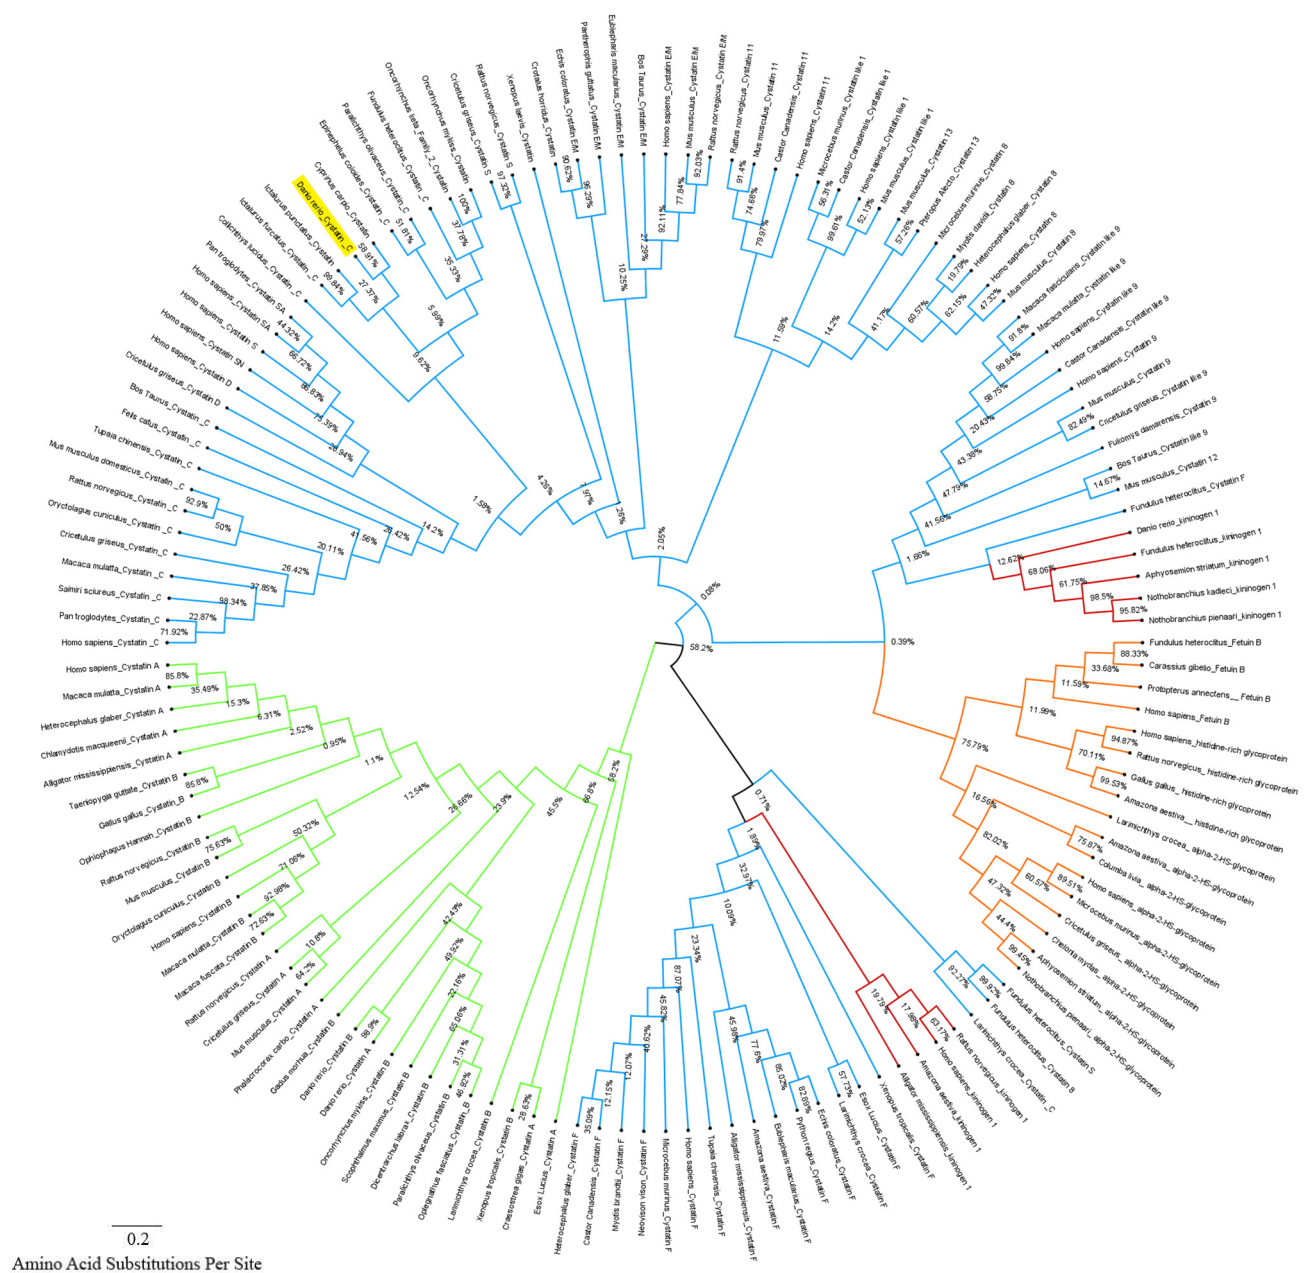

**Supplementary Figure S1:** Complete initial phylogenetic tree. Type 1 Cystatins in Green, Type 2 Cystatins in Blue, Type 3 Cystatins in Red and Type 4 Cystatins in Orange. The *Danio rerio* amino sequence highlighted yellow. This was filtered to formulate the final refined tree available in the main text.



**Supplementary Table S1:** Detailed description of the electrostatic charge and hydrophobic residue distribution on the protein surface of Cystatin C of *D. rerio*.

| Patch | Type        | Size (Å <sup>2</sup> ) | Score   | Intensity<br>(Score / Size) |
|-------|-------------|------------------------|---------|-----------------------------|
| 1     | Positive    | 1024.2                 | 866.788 | 0.846                       |
| 2     | Positive    | 43.4                   | 38.615  | 0.89                        |
| 3     | Positive    | 15.4                   | 0       | 0                           |
| 4     | Positive    | 672.4                  | 597.782 | 0.889                       |
| 5     | Positive    | 21.5                   | 17.476  | 0.811                       |
| 6     | Positive    | 18.4                   | 7.222   | 0.393                       |
| 7     | Negative    | 120.9                  | 115.675 | 0.957                       |
| 8     | Negative    | 60.1                   | 77.194  | 1.284                       |
| 9     | Negative    | 86.8                   | 105.921 | 1.221                       |
| 10    | Negative    | 251.3                  | 281.105 | 1.119                       |
| 11    | Negative    | 79.9                   | 80.66   | 1.01                        |
| 12    | Negative    | 104.4                  | 154.691 | 1.482                       |
| 13    | Negative    | 23.4                   | 24.225  | 1.035                       |
| 14    | Negative    | 206.6                  | 253.733 | 1.228                       |
| 15    | Negative    | 41.3                   | 34.583  | 0.837                       |
| 16    | Negative    | 29.9                   | 21.893  | 0.732                       |
| 17    | Negative    | 25.6                   | 12.23   | 0.477                       |
| 18    | Negative    | 17.9                   | 13.604  | 0.76                        |
| 19    | Negative    | 176.2                  | 251.095 | 1.425                       |
| 20    | Negative    | 25                     | 32.309  | 1.294                       |
| 21    | Hydrophobic | 1223.1                 | 858.725 | 0.702                       |
| 22    | Hydrophobic | 104.5                  | 75.331  | 0.721                       |
| 23    | Hydrophobic | 51.1                   | 35.154  | 0.688                       |
| 24    | Hydrophobic | 84.9                   | 43.78   | 0.516                       |
| 25    | Hydrophobic | 143                    | 92.19   | 0.645                       |
| 26    | Hydrophobic | 112.5                  | 62.656  | 0.557                       |
| 27    | Hydrophobic | 107.4                  | 53.777  | 0.501                       |
| 28    | Hydrophobic | 53.9                   | 43.302  | 0.803                       |

**Supplementary Table S2:** Protein Surface Analysis of the interacting surfaces between Cystatin C (A) and Papain (B). Details regarding the types of bonding including Hydrogen Bonding (HB), Salt Bridges (SB), Pi Stacking (Pi), Disulfide bonding (DS) and Vander Waal interactions (VW).

| Residue   | Closest                                        | Distance (Å)             | HB | SB | Pi | DS | VW |
|-----------|------------------------------------------------|--------------------------|----|----|----|----|----|
| A:53:Tyr  |                                                |                          | 0  | 0  | 0  | 0  | 0  |
| A:58:Ser  |                                                |                          | 0  | 0  | 0  | 0  | 0  |
| A:59:Lys  |                                                |                          | 0  | 0  | 0  | 0  | 1  |
| A:78:Asp  | B:156:Lys                                      | 2.7                      | 0  | 1  | 0  | 0  | 11 |
| A:80:Ala  |                                                |                          | 0  | 0  | 0  | 0  | 0  |
| A:83:Thr  | B:64:Asn                                       | 2.1                      | 0  | 0  | 0  | 0  | 9  |
| A:84:Cyx  |                                                |                          | 0  | 0  | 0  | 0  | 0  |
| A:85:Arg  |                                                |                          | 0  | 0  | 0  | 0  | 0  |
| A:90:Glu  |                                                |                          | 0  | 0  | 0  | 0  | 0  |
| A:92:Leu  | B:61:Tyr                                       | 2.2                      | 0  | 0  | 0  | 0  | 1  |
| A:93:Cyx  |                                                |                          | 0  | 0  | 0  | 0  | 0  |
| A:94:Ala  |                                                |                          | 0  | 0  | 0  | 0  | 0  |
| A:95:Ile  | B:158:Asp                                      | 2.4                      | 0  | 0  | 0  | 0  | 15 |
| A:96:His  | B:158:Asp                                      | 2.9                      | 0  | 0  | 0  | 0  | 0  |
| A:97:Glu  | B:25:Cys<br>B:159:His<br>B:158:Asp<br>B:66:Gly | 2.3<br>2.3<br>2.7<br>3.0 | 1  | 0  | 0  | 0  | 9  |
| A:98:Asn  | B:19:Gln                                       | 2.2                      | 0  | 0  | 0  | 0  | 2  |
| A:99:Pro  | B:177:Trp<br>B:142:Gln                         | 1.8<br>2.5               | 0  | 0  | 0  | 0  | 20 |
| A:100:Glu |                                                |                          | 0  | 0  | 0  | 0  | 0  |
| A:101:Ile |                                                |                          | 0  | 0  | 0  | 0  | 0  |
| A:102:Ala |                                                |                          | 0  | 0  | 0  | 0  | 0  |
| A:103:Gln |                                                |                          | 0  | 0  | 0  | 0  | 0  |

**Supplementary Table S3:** Protein Surface Analysis of interacting surfaces between Cystatin C (A), Cathepsin B (B). Details regarding the types of bonding including Hydrogen Bonding (HB), Salt Bridges (SB), Pi Stacking (Pi), Disulfide bonding (DS) and Vander Waal interactions (VW).

| Residue   | Closest   | Distance (Å) | HB | SB | Pi | DS | VW |
|-----------|-----------|--------------|----|----|----|----|----|
| A:2:Phe   |           |              | 0  | 0  | 0  | 0  | 0  |
| A:3:Leu   | B:65:Ser  | 3.0 A        | 0  | 0  | 0  | 0  | 1  |
| A:4:Lys   |           |              | 0  | 0  | 0  | 0  | 0  |
| A:9:Phe   |           |              | 0  | 0  | 0  | 0  | 0  |
| A:12:Val  |           |              | 0  | 0  | 0  | 0  | 0  |
| A:43:Ala  |           |              | 0  | 0  | 0  | 0  | 0  |
| A:44:Gln  | B:196:Met | 2.4 A        | 1  | 0  | 0  | 0  | 0  |
| A:45:Tyr  |           |              | 0  | 0  | 0  | 0  | 0  |
| A:47:Arg  | B:196:Met | 2.2 A        | 0  | 0  | 0  | 0  | 5  |
| A:48:Gln  |           |              | 0  | 0  | 0  | 0  | 0  |
| A:49:Ser  |           |              | 0  | 0  | 0  | 0  | 0  |
| A:50:Asn  |           |              | 0  | 0  | 0  | 0  | 0  |
| A:86:Lys  |           |              | 0  | 0  | 0  | 0  | 0  |
| A:87:Gly  |           |              | 0  | 0  | 0  | 0  | 0  |
| A:105:Lys |           |              | 0  | 0  | 0  | 0  | 0  |
| A:108:Lys |           |              | 0  | 0  | 0  | 0  | 0  |

**Supplementary Table S4:** Protein Surface Analysis of interacting surfaces between Cystatin C (A), Cathepsin H (B). Details regarding the types of bonding including Hydrogen Bonding (HB), Salt Bridges (SB), Pi Stacking (Pi), Disulfide bonding (DS) and Vander Waal interactions (VW).

| Residue   | Closest               | Distance (Å)   | HB | SB | Pi | DS | VW |
|-----------|-----------------------|----------------|----|----|----|----|----|
| A:1:Met   | B:21:Ser<br>B:63:Cyx  | 1.3 A<br>2.6 A | 0  | 0  | 0  | 0  | 21 |
| A:2:Phe   |                       |                | 0  | 0  | 0  | 0  | 0  |
| A:3:Leu   |                       |                | 0  | 0  | 0  | 0  | 4  |
| A:4:Lys   | B:142:Leu             | 1.9 A          | 0  | 0  | 0  | 0  | 21 |
| A:7:Val   |                       |                | 0  | 0  | 0  | 0  | 0  |
| A:8:Ala   | B:63:Cyx<br>B:23:Gly  | 2.0 A<br>2.8 A | 0  | 0  | 0  | 0  | 9  |
| A:9:Phe   | B:23:Gly<br>B:158:Asn | 2.7 A<br>2.9 A | 0  | 0  | 0  | 0  | 13 |
| A:10:Leu  |                       |                | 0  | 0  | 0  | 0  | 0  |
| A:12:Val  |                       |                | 0  | 0  | 0  | 0  | 1  |
| A:13:Ile  |                       |                | 0  | 0  | 0  | 0  | 0  |
| A:25:Pro  |                       |                | 0  | 0  | 0  | 0  | 0  |
| A:66:Gln  |                       |                | 0  | 0  | 0  | 0  | 0  |
| A:72:Lys  |                       |                | 0  | 0  | 0  | 0  | 0  |
| A:74:Ile  |                       |                | 0  | 0  | 0  | 0  | 0  |
| A:108:Lys |                       |                | 0  | 0  | 0  | 0  | 0  |
| A:110:Val |                       |                | 0  | 0  | 0  | 0  | 0  |
| A:124:Glu |                       |                | 0  | 0  | 0  | 0  | 0  |
| A:125:Asn |                       |                | 0  | 0  | 0  | 0  | 0  |
| A:126:Ser |                       |                | 0  | 0  | 0  | 0  | 0  |
| A:127:Cyx |                       |                | 0  | 0  | 0  | 0  | 0  |
| A:128:Leu |                       |                | 0  | 0  | 0  | 0  | 0  |



**Supplementary Table S5:** Protein Surface Analysis of interacting surfaces between Cystatin C (A), Cathepsin L1 (B). Details regarding the types of bonding including Hydrogen Bonding (HB), Salt Bridges (SB), Pi Stacking (Pi), Disulfide bonding (DS) and Vander Waal interactions (VW).

| Residue   | Closest                          | Distance (Å)            | HB | SB | Pi | DS | VW |
|-----------|----------------------------------|-------------------------|----|----|----|----|----|
| A:1:Met   |                                  |                         | 0  | 0  | 0  | 0  | 0  |
| A:2:Phe   | B:66:Asn                         | 2.1 A                   | 0  | 0  | 0  | 0  | 5  |
| A:3:Leu   | B:66:Asn<br>B:65:Cyx<br>B:67:Gly | 2.0 A<br>2.8 A<br>2.9 A | 0  | 0  | 0  | 0  | 22 |
| A:4:Lys   | B:19:Gln                         | 2.7 A                   | 0  | 0  | 0  | 0  | 6  |
| A:5:Ile   |                                  |                         | 0  | 0  | 0  | 0  | 0  |
| A:9:Phe   | B:162:Asp                        | 2.5 A                   | 0  | 0  | 0  | 0  | 17 |
| A:10:Leu  |                                  |                         | 0  | 0  | 0  | 0  | 0  |
| A:11:Ala  |                                  |                         | 0  | 0  | 0  | 0  | 0  |
| A:12:Val  |                                  |                         | 0  | 0  | 0  | 0  | 0  |
| A:13:Ile  | B:21:Gln                         | 2.0 A                   | 0  | 0  | 0  | 0  | 6  |
| A:14:Leu  |                                  |                         | 0  | 0  | 0  | 0  | 0  |
| A:16:Val  |                                  |                         | 0  | 0  | 0  | 0  | 0  |
| A:17:Ser  |                                  |                         | 0  | 0  | 0  | 0  | 0  |
| A:44:Gln  |                                  |                         | 0  | 0  | 0  | 0  | 0  |
| A:45:Tyr  |                                  |                         | 0  | 0  | 0  | 0  | 0  |
| A:48:Gln  |                                  |                         | 0  | 0  | 0  | 0  | 0  |
| A:72:Lys  |                                  |                         | 0  | 0  | 0  | 0  | 0  |
| A:110:Val |                                  |                         | 0  | 0  | 0  | 0  | 0  |
| A:121:Lys |                                  |                         | 0  | 0  | 0  | 0  | 0  |
| A:122:Val |                                  |                         | 0  | 0  | 0  | 0  | 0  |
| A:123:Thr |                                  |                         | 0  | 0  | 0  | 0  | 0  |
| A:124:Glu |                                  |                         | 0  | 0  | 0  | 0  | 2  |
| A:125:Asn |                                  |                         | 0  | 0  | 0  | 0  | 0  |
| A:126:Ser |                                  |                         | 0  | 0  | 0  | 0  | 0  |

**Supplementary Table S6:** Protein Surface Analysis of interacting surfaces between Cystatin C (A), Cathepsin S (B). Details regarding the types of bonding including Hydrogen Bonding (HB), Salt Bridges (SB), Pi Stacking (Pi), Disulfide bonding (DS) and Vander Waal interactions (VW).

| Residue   | Closest   | Distance (Å) | HB | SB | Pi | DS | VW |
|-----------|-----------|--------------|----|----|----|----|----|
| A:1:Met   | B:57C:Lys | 2.5 A        | 0  | 0  | 0  | 0  | 5  |
| A:2:Phe   |           |              | 0  | 0  | 0  | 0  | 0  |
| A:3:Leu   |           |              | 0  | 0  | 0  | 0  | 0  |
| A:8:Ala   |           |              | 0  | 0  | 0  | 0  | 0  |
| A:9:Phe   | B:113:Tyr | 2.3 A        | 0  | 0  | 0  | 0  | 4  |
| A:25:Pro  |           |              | 0  | 0  | 0  | 0  | 1  |
| A:45:Tyr  |           |              | 0  | 0  | 0  | 0  | 0  |
| A:48:Gln  |           |              | 0  | 0  | 0  | 0  | 0  |
| A:61:Thr  |           |              | 0  | 0  | 0  | 0  | 0  |
| A:62:Lys  |           |              | 0  | 0  | 0  | 0  | 0  |
| A:64:Gln  |           |              | 0  | 0  | 0  | 0  | 0  |
| A:66:Gln  |           |              | 0  | 0  | 0  | 0  | 0  |
| A:72:Lys  |           |              | 0  | 0  | 0  | 0  | 0  |
| A:74:Ile  | B:61:Lys  | 2.2 A        | 0  | 0  | 0  | 0  | 12 |
| A:75:Phe  |           |              | 0  | 0  | 0  | 0  | 0  |
| A:76:Thr  |           |              | 0  | 0  | 0  | 0  | 1  |
| A:105:Lys |           |              | 0  | 0  | 0  | 0  | 0  |
| A:106:Glu |           |              | 0  | 0  | 0  | 0  | 0  |
| A:108:Lys | B:61:Lys  | 2.8 A        | 0  | 0  | 0  | 0  | 13 |
| A:124:Glu | B:67:Phe  | 2.4 A        | 0  | 0  | 0  | 0  | 3  |
| A:125:Asn |           |              | 0  | 0  | 0  | 0  | 0  |
| A:126:Ser |           |              | 0  | 0  | 0  | 0  | 0  |
| A:127:Cyx |           |              | 0  | 0  | 0  | 0  | 1  |
| A:128:Leu |           |              | 0  | 0  | 0  | 0  | 2  |

## 2. Analysis of Human and Rat AChE

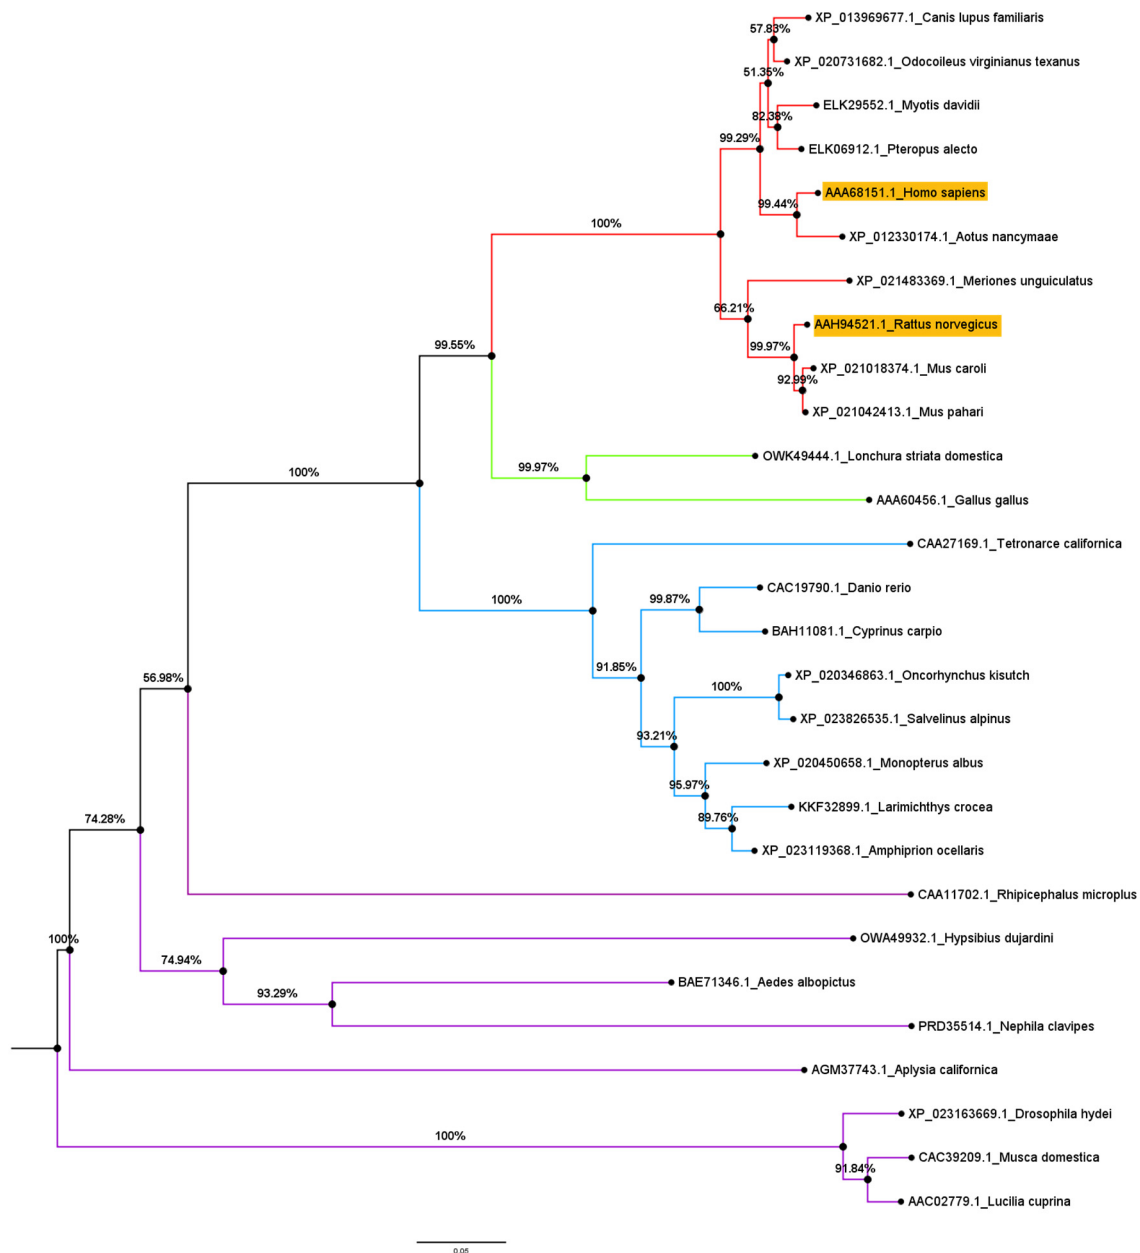

**Supplementary Figure S5:** Phylogenetic Tree Analysis of Acetylcholinesterase. Clear distinct clade separation represented as follows with Mammalian Ache in Red, Aves Ache in Green, Pisces in Blue and Invertebrate Ache in Purple. *Homo sapiens* and *Rattus norvegicus* highlighted in yellow.

XP\_013969677.1 1 -----MRPFWCLH--PSIASLILMLILGGGAS--DPLILVVRGRI  
 XP\_020731682.1 60 GRRRLPALAMRPFWCLH--PSIASLILMLILGGGAS--DPLILVVRGRI  
 ELK29552.1\_Myot 1 -----MRPFWCLH--PSIASLILMLILGGGAS--DPLILVVRGRI  
 ELK06912.1\_Pter 1 -----MRPFWCLH--LFFPSLILMLILGG--RAERLEDELLVVRGRI  
**AA68151.1\_Homo** 1 -----MRPFWCLH--PSIASLILMLILGGGAS--DPLILVVRGRI  
 XP\_012330174.1 59 SDFACP--AMRPFWCLH--PSIASLILMLILGGGAS--DPLILVVRGRI  
 XP\_021483369.1 1 -----MRPFWCLH--PSIASLILMLILGGGAS--DPLILVVRGRI  
**AN94521.1\_Ratt** 1 -----MRPFWCLH--PSIASLILMLILGGGAS--DPLILVVRGRI  
 XP\_021018374.1 1 -----MRPFWCLH--PSIASLILMLILGGGAS--DPLILVVRGRI  
 XP\_021042413.1 1 -----MRPFWCLH--PSIASLILMLILGGGAS--DPLILVVRGRI  
 consensus 61 \*\*\*\*\*  
 XP\_013969677.1 46 RGRIRKAGGCVSAFLGIFPAEPVVGPRFLPEPRKFWSGVLDATIRQSVQYQVDTLL  
 XP\_020731682.1 117 RGRIRKAGGCVSAFLGIFPAEPVVGPRFLPEPRKFWSGVLDATIRQSVQYQVDTLL  
 ELK29552.1\_Myot 51 RGRIRKAGGCVSAFLGIFPAEPVVGPRFLPEPRKFWSGVLDATIRQSVQYQVDTLL  
 ELK06912.1\_Pter 47 RGRIRKAGGCVSAFLGIFPAEPVVGPRFLPEPRKFWSGVLDATIRQSVQYQVDTLL  
**AA68151.1\_Homo** 47 RGRIRKAGGCVSAFLGIFPAEPVVGPRFLPEPRKFWSGVLDATIRQSVQYQVDTLL  
 XP\_012330174.1 49 RGRIRKAGGCVSAFLGIFPAEPVVGPRFLPEPRKFWSGVLDATIRQSVQYQVDTLL  
 XP\_021483369.1 38 RGRIRKAGGCVSAFLGIFPAEPVVGPRFLPEPRKFWSGVLDATIRQSVQYQVDTLL  
**AN94521.1\_Ratt** 49 RGRIRKAGGCVSAFLGIFPAEPVVGPRFLPEPRKFWSGVLDATIRQSVQYQVDTLL  
 XP\_021018374.1 49 RGRIRKAGGCVSAFLGIFPAEPVVGPRFLPEPRKFWSGVLDATIRQSVQYQVDTLL  
 XP\_021042413.1 49 RGRIRKAGGCVSAFLGIFPAEPVVGPRFLPEPRKFWSGVLDATIRQSVQYQVDTLL  
 consensus 121 \*\*\*\*\*  
 XP\_013969677.1 106 PGFGETDMNPNIRELSDCLYNVWTPYPRRSPTPVLWIIYGGGFYSGASSLDVYDGR  
 XP\_020731682.1 177 PGFGETDMNPNIRELSDCLYNVWTPYPRRSPTPVLWIIYGGGFYSGASSLDVYDGR  
 ELK29552.1\_Myot 111 PGFGETDMNPNIRELSDCLYNVWTPYPRRSPTPVLWIIYGGGFYSGASSLDVYDGR  
 ELK06912.1\_Pter 107 PGFGETDMNPNIRELSDCLYNVWTPYPRRSPTPVLWIIYGGGFYSGASSLDVYDGR  
**AA68151.1\_Homo** 109 PGFGETDMNPNIRELSDCLYNVWTPYPRRSPTPVLWIIYGGGFYSGASSLDVYDGR  
 XP\_012330174.1 175 PGFGETDMNPNIRELSDCLYNVWTPYPRRSPTPVLWIIYGGGFYSGASSLDVYDGR  
 XP\_021483369.1 98 PGFGETDMNPNIRELSDCLYNVWTPYPRRSPTPVLWIIYGGGFYSGASSLDVYDGR  
**AN94521.1\_Ratt** 109 PGFGETDMNPNIRELSDCLYNVWTPYPRRSPTPVLWIIYGGGFYSGASSLDVYDGR  
 XP\_021018374.1 109 PGFGETDMNPNIRELSDCLYNVWTPYPRRSPTPVLWIIYGGGFYSGASSLDVYDGR  
 XP\_021042413.1 109 PGFGETDMNPNIRELSDCLYNVWTPYPRRSPTPVLWIIYGGGFYSGASSLDVYDGR  
 consensus 181 \*\*\*\*\*  
 XP\_013969677.1 166 LAQAGGVLVSNVVRGARGFIALPGSREAGNVGLLDORLALQWQENVAAPGDDPMSV  
 XP\_020731682.1 237 LAQAGGVLVSNVVRGARGFIALPGSREAGNVGLLDORLALQWQENVAAPGDDPMSV  
 ELK29552.1\_Myot 171 LAQAGGVLVSNVVRGARGFIALPGSREAGNVGLLDORLALQWQENVAAPGDDPMSV  
 ELK06912.1\_Pter 167 LAQAGGVLVSNVVRGARGFIALPGSREAGNVGLLDORLALQWQENVAAPGDDPMSV  
**AA68151.1\_Homo** 169 LAQAGGVLVSNVVRGARGFIALPGSREAGNVGLLDORLALQWQENVAAPGDDPMSV  
 XP\_012330174.1 235 LAQAGGVLVSNVVRGARGFIALPGSREAGNVGLLDORLALQWQENVAAPGDDPMSV  
 XP\_021483369.1 158 LAQAGGVLVSNVVRGARGFIALPGSREAGNVGLLDORLALQWQENVAAPGDDPMSV  
**AN94521.1\_Ratt** 169 LAQAGGVLVSNVVRGARGFIALPGSREAGNVGLLDORLALQWQENVAAPGDDPMSV  
 XP\_021018374.1 169 LAQAGGVLVSNVVRGARGFIALPGSREAGNVGLLDORLALQWQENVAAPGDDPMSV  
 XP\_021042413.1 169 LAQAGGVLVSNVVRGARGFIALPGSREAGNVGLLDORLALQWQENVAAPGDDPMSV  
 consensus 241 \*\*\*\*\*  
 XP\_013969677.1 226 ILFGSAGAASVGMHLLSPFSRGLFHRVAVLQSGFENGFWATVGEARRRATILARIYGG  
 XP\_020731682.1 297 ILFGSAGAASVGMHLLSPFSRGLFHRVAVLQSGFENGFWATVGEARRRATILARIYGG  
 ELK29552.1\_Myot 231 ILFGSAGAASVGMHLLSPFSRGLFHRVAVLQSGFENGFWATVGEARRRATILARIYGG  
 ELK06912.1\_Pter 227 ILFGSAGAASVGMHLLSPFSRGLFHRVAVLQSGFENGFWATVGEARRRATILARIYGG  
**AA68151.1\_Homo** 229 ILFGSAGAASVGMHLLSPFSRGLFHRVAVLQSGFENGFWATVGEARRRATILARIYGG  
 XP\_012330174.1 295 ILFGSAGAASVGMHLLSPFSRGLFHRVAVLQSGFENGFWATVGEARRRATILARIYGG  
 XP\_021483369.1 218 ILFGSAGAASVGMHLLSPFSRGLFHRVAVLQSGFENGFWATVGEARRRATILARIYGG  
**AN94521.1\_Ratt** 229 ILFGSAGAASVGMHLLSPFSRGLFHRVAVLQSGFENGFWATVGEARRRATILARIYGG  
 XP\_021018374.1 229 ILFGSAGAASVGMHLLSPFSRGLFHRVAVLQSGFENGFWATVGEARRRATILARIYGG  
 XP\_021042413.1 229 ILFGSAGAASVGMHLLSPFSRGLFHRVAVLQSGFENGFWATVGEARRRATILARIYGG  
 consensus 301 \*\*\*\*\*  
 XP\_013969677.1 286 PGGGAGNDTELVACLRTPAQDLVDEHNVLPQESVFRFSFVFWVDGDFLSDTPEALIS  
 XP\_020731682.1 357 PGGGAGNDTELVACLRTPAQDLVDEHNVLPQESVFRFSFVFWVDGDFLSDTPEALIN  
 ELK29552.1\_Myot 291 PGGGAGNDTELVACLRTPAQDLVDEHNVLPQESVFRFSFVFWVDGDFLSDTPEALIN  
 ELK06912.1\_Pter 287 PGGGAGNDTELVACLRTPAQDLVDEHNVLPQESVFRFSFVFWVDGDFLSDTPEALIN  
**AA68151.1\_Homo** 289 PGGGAGNDTELVACLRTPAQDLVDEHNVLPQESVFRFSFVFWVDGDFLSDTPEALIN  
 XP\_012330174.1 355 PGGGAGNDTELVACLRTPAQDLVDEHNVLPQESVFRFSFVFWVDGDFLSDTPEALIN  
 XP\_021483369.1 278 PGGGAGNDTELVACLRTPAQDLVDEHNVLPQESVFRFSFVFWVDGDFLSDTPEALIN  
**AN94521.1\_Ratt** 289 PGGGAGNDTELVACLRTPAQDLVDEHNVLPQESVFRFSFVFWVDGDFLSDTPEALIN  
 XP\_021018374.1 289 PGGGAGNDTELVACLRTPAQDLVDEHNVLPQESVFRFSFVFWVDGDFLSDTPEALIN  
 XP\_021042413.1 289 PGGGAGNDTELVACLRTPAQDLVDEHNVLPQESVFRFSFVFWVDGDFLSDTPEALIN  
 consensus 361 \*\*\*\*\*  
 XP\_013969677.1 346 AGDFHGLQVLGVWVKDEGSYFLVYGAGFSGSDNESLISRAQFLAGVGVQASDLAAEA  
 XP\_020731682.1 417 AGDFHGLQVLGVWVKDEGSYFLVYGAGFSGSDNESLISRAQFLAGVGVQASDLAAEA  
 ELK29552.1\_Myot 351 AGDFHGLQVLGVWVKDEGSYFLVYGAGFSGSDNESLISRAQFLAGVGVQASDLAAEA  
 ELK06912.1\_Pter 347 AGDFHGLQVLGVWVKDEGSYFLVYGAGFSGSDNESLISRAQFLAGVGVQASDLAAEA  
**AA68151.1\_Homo** 349 AGDFHGLQVLGVWVKDEGSYFLVYGAGFSGSDNESLISRAQFLAGVGVQASDLAAEA  
 XP\_012330174.1 415 AGDFHGLQVLGVWVKDEGSYFLVYGAGFSGSDNESLISRAQFLAGVGVQASDLAAEA  
 XP\_021483369.1 335 AGDFHGLQVLGVWVKDEGSYFLVYGAGFSGSDNESLISRAQFLAGVGVQASDLAAEA  
**AN94521.1\_Ratt** 349 AGDFHGLQVLGVWVKDEGSYFLVYGAGFSGSDNESLISRAQFLAGVGVQASDLAAEA  
 XP\_021018374.1 349 AGDFHGLQVLGVWVKDEGSYFLVYGAGFSGSDNESLISRAQFLAGVGVQASDLAAEA  
 XP\_021042413.1 349 AGDFHGLQVLGVWVKDEGSYFLVYGAGFSGSDNESLISRAQFLAGVGVQASDLAAEA  
 consensus 421 \*\*\*\*\*  
 XP\_013969677.1 406 VVLYHTDNLHPEDEPARLEANSVVGSDNVVCPVAQLAGRLAAQGARVYATIFERRASTI  
 XP\_020731682.1 477 VVLYHTDNLHPEDEPARLEANSVVGSDNVVCPVAQLAGRLAAQGARVYATIFERRASTI  
 ELK29552.1\_Myot 411 VVLYHTDNLHPEDEPARLEANSVVGSDNVVCPVAQLAGRLAAQGARVYATIFERRASTI  
 ELK06912.1\_Pter 407 VVLYHTDNLHPEDEPARLEANSVVGSDNVVCPVAQLAGRLAAQGARVYATIFERRASTI  
**AA68151.1\_Homo** 409 VVLYHTDNLHPEDEPARLEANSVVGSDNVVCPVAQLAGRLAAQGARVYATIFERRASTI  
 XP\_012330174.1 475 VVLYHTDNLHPEDEPARLEANSVVGSDNVVCPVAQLAGRLAAQGARVYATIFERRASTI  
 XP\_021483369.1 395 VVLYHTDNLHPEDEPARLEANSVVGSDNVVCPVAQLAGRLAAQGARVYATIFERRASTI  
**AN94521.1\_Ratt** 409 VVLYHTDNLHPEDEPARLEANSVVGSDNVVCPVAQLAGRLAAQGARVYATIFERRASTI  
 XP\_021018374.1 409 VVLYHTDNLHPEDEPARLEANSVVGSDNVVCPVAQLAGRLAAQGARVYATIFERRASTI  
 XP\_021042413.1 409 VVLYHTDNLHPEDEPARLEANSVVGSDNVVCPVAQLAGRLAAQGARVYATIFERRASTI  
 consensus 481 \*\*\*\*\*

**Supplementary Figure S6:** Multiple Sequence Alignment by ClustalW of mammalian Ache. Symbol \* depicts highly conserved sequence motifs. *Homo sapiens* sequence highlighted in yellow and *Rattus norvegicus* highlighted in green.

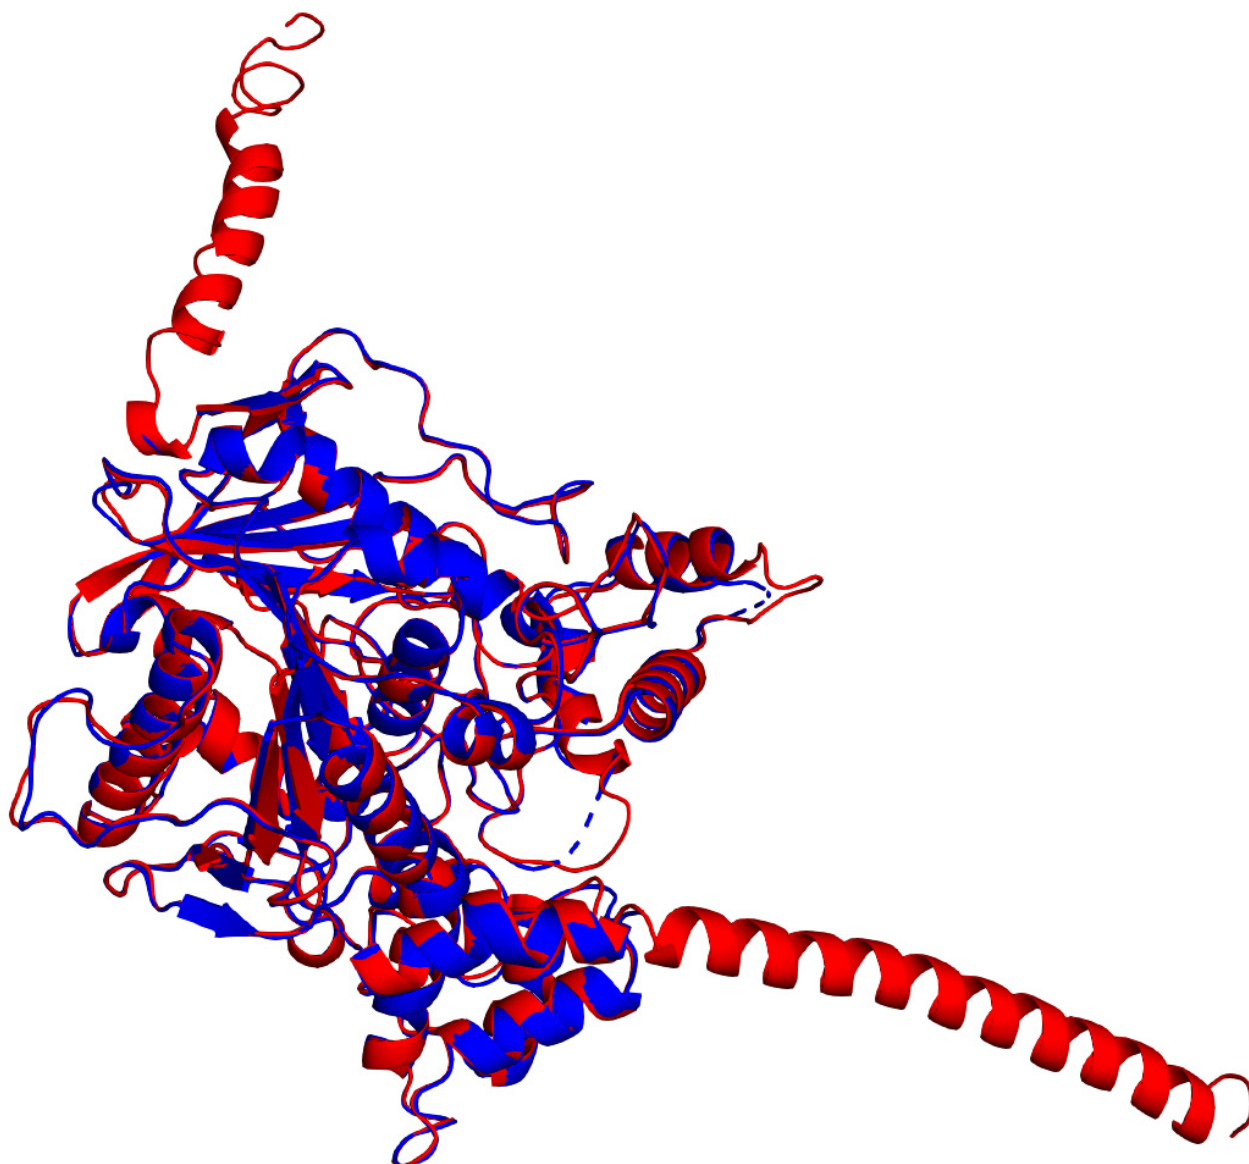

**Supplementary Figure S7:** The three-dimensional alignment of the AChE crystal structure of *Rattus norvegicus* (red) against the AChE crystal structure of *Homo sapiens* (blue).

**Supplementary Table S7:** AutoDock Vina results for protein ligand docking between hAChE and Echothiophate.

| Mode | Affinity   | Distance from best mode |           |
|------|------------|-------------------------|-----------|
|      | (kcal/mol) | rmsd l.b.               | rmsd u.b. |
| 1    | -5.6       | 0                       | 0         |
| 2    | -5.5       | 1.91                    | 3.012     |
| 3    | -5.5       | 3.554                   | 5.917     |
| 4    | -5.4       | 1.434                   | 3.414     |
| 5    | -5.3       | 3.056                   | 5.733     |
| 6    | -5.2       | 3.6                     | 5.82      |
| 7    | -4.9       | 2.177                   | 3.504     |
| 8    | -4.8       | 3.555                   | 5.875     |
| 9    | -4.7       | 2.272                   | 3.646     |

**Supplementary Table S8:** AutoDock Vina results for protein ligand docking between rAChE and Echothiophate.

| Mode | Affinity   | Distance from best mode |           |
|------|------------|-------------------------|-----------|
|      | (kcal/mol) | rmsd l.b.               | rmsd u.b. |
| 1    | -4.7       | 0                       | 0         |
| 2    | -4.5       | 1.906                   | 2.462     |
| 3    | -4.5       | 3.9                     | 4.962     |
| 4    | -4.5       | 3.912                   | 4.817     |
| 5    | -4.4       | 1.957                   | 2.752     |
| 6    | -4.4       | 1.951                   | 2.9       |
| 7    | -4.4       | 1.099                   | 3.189     |
| 8    | -4.3       | 3.788                   | 4.826     |
| 9    | -4.1       | 1.58                    | 3.36      |

**Supplementary Table S9:** AutoDock Vina results for protein ligand docking between hAChE and the negative control Imidazole.

| Mode | Affinity   | Distance from best mode |           |
|------|------------|-------------------------|-----------|
|      | (kcal/mol) | rmsd l.b.               | rmsd u.b. |
| 1    | -3.3       | 0                       | 0         |
| 2    | -3.3       | 16.04                   | 16.42     |
| 3    | -3.2       | 16.927                  | 17.148    |
| 4    | -3.2       | 11.862                  | 12.551    |
| 5    | -3         | 16.012                  | 16.246    |
| 6    | -3         | 11.788                  | 12.15     |
| 7    | -3         | 16.386                  | 16.685    |
| 8    | -3         | 17.025                  | 17.716    |
| 9    | -2.9       | 16.189                  | 16.412    |



**Supplementary Table S10:** AutoDock Vina results for protein ligand docking between rAChE and the negative control Imidazole.

| Mode | Affinity   | Distance from best mode |           |
|------|------------|-------------------------|-----------|
|      | (kcal/mol) | rmsd l.b.               | rmsd u.b. |
| 1    | -3.2       | 0                       | 0         |
| 2    | -3.2       | 12.014                  | 12.21     |
| 3    | -3.1       | 13.551                  | 13.739    |
| 4    | -3.1       | 16.373                  | 16.682    |
| 5    | -3.1       | 15.291                  | 15.815    |
| 6    | -3         | 17.291                  | 17.651    |
| 7    | -3         | 12.631                  | 13.237    |
| 8    | -3         | 5.996                   | 6.58      |
| 9    | -2.8       | 16.366                  | 16.565    |

### 3. Docking analysis between Survivin protein and 4-hydroxypyridine 1-oxide pyridin-4-ol 1-oxide

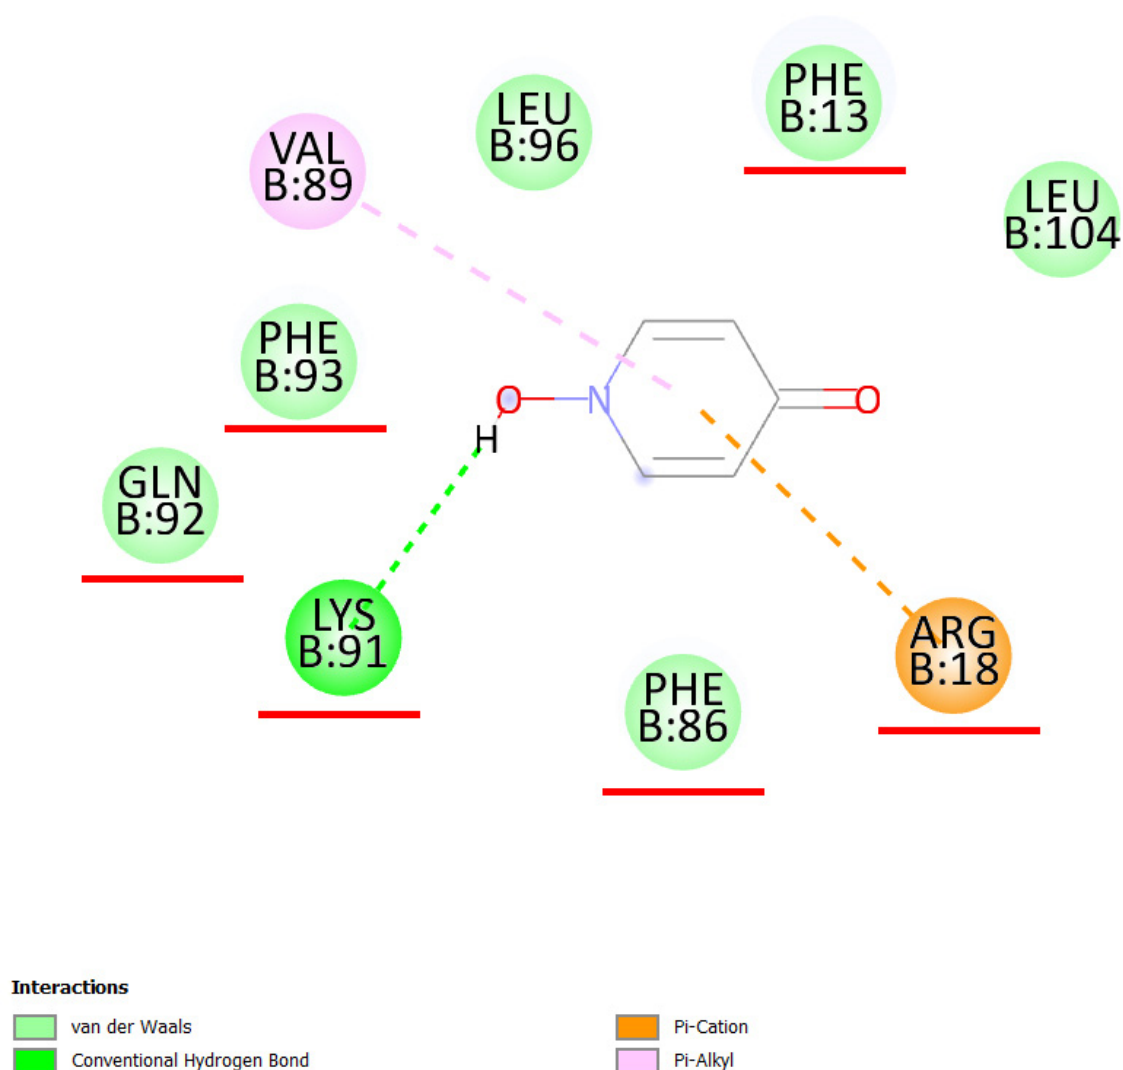

**Supplementary Figure S8:** The 2D representation of the protein-ligand complex formed in the Survivin protein and 4-hydroxypyridine 1-oxide pyridin-4-ol 1-oxide. The amino acid residues that were present in the original study have been marked by a red underline.

**Supplementary Table S11:** AutoDock Vina results for protein ligand docking between Survivin protein and 4-hydroxypyridine 1-oxide pyridin-4-ol 1-oxide.

| Mode | Affinity   | Distance from best mode |           |
|------|------------|-------------------------|-----------|
|      | (kcal/mol) | rmsd l.b.               | rmsd u.b. |
| 1    | -4.6       | 0                       | 0         |
| 2    | -4.5       | 1.799                   | 2.119     |
| 3    | -4.5       | 3.621                   | 4.458     |
| 4    | -4.4       | 1.973                   | 3.053     |
| 5    | -4.3       | 1.095                   | 3.186     |
| 6    | -4.3       | 3.834                   | 4.07      |
| 7    | -4.2       | 3.581                   | 4.581     |
| 8    | -4.1       | 3.174                   | 4.023     |
| 9    | -4.1       | 3.626                   | 4.078     |

#### 4. Docking analysis between Haemoglobin and Heam.

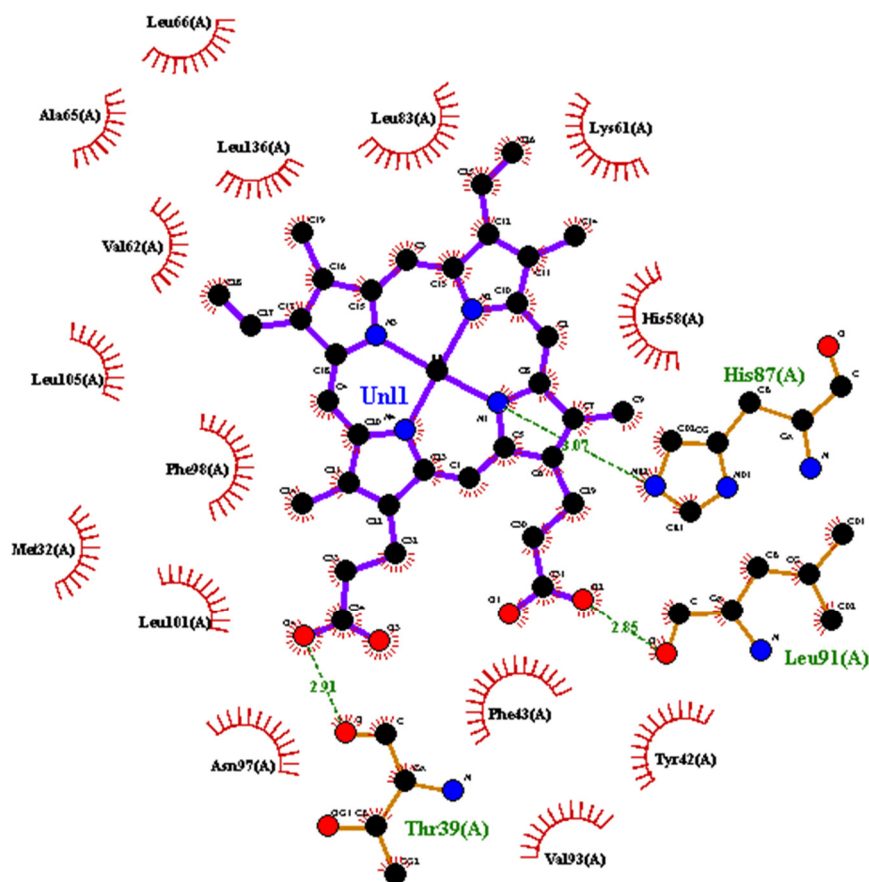

**Supplementary Figure S9:** The 2D representation of the protein-ligand complex formed in the Hemoglobin and the heam ligand. The characteristic “heme coordinated to the histidine residue” protein-ligand interaction can be seen between the heam ligand’s central iron atom and the Haemoglobin's Histidine amino acid.

**Supplementary Table S12:** AutoDock Vina results for protein ligand docking between Haemoglobin and Heam.

| Mode | Affinity   | Distance from best mode |           |
|------|------------|-------------------------|-----------|
|      | (kcal/mol) | rmsd l.b.               | rmsd u.b. |
| 1    | -11.4      | 0                       | 0         |
| 2    | -11.3      | 2.448                   | 6.798     |
| 3    | -11.1      | 2.469                   | 6.164     |
| 4    | -11.1      | 0.357                   | 6.347     |
| 5    | -10.8      | 4.346                   | 9.924     |
| 6    | -9.7       | 2.932                   | 6.106     |
| 7    | -9.7       | 4.683                   | 10.216    |
| 8    | -8.8       | 4.031                   | 8.964     |
| 1    | -11.4      | 0                       | 0         |
